# Supplementary material for: Incidental Findings in Computed Tomography Examination of the Head in Rabbits and Guinea Pigs
Source: MDPI journal article supplement (doi:10.3390/vetsci10080504), 2023-08-04
Supplement: s1 [file s1]

**Table S1.** Description and classification of the CT finding of the CT studies of the head in rabbits and guinea pigs.

| Organ              | Lesion description                                                     |                                                               |                                                                         |                                     |
|--------------------|------------------------------------------------------------------------|---------------------------------------------------------------|-------------------------------------------------------------------------|-------------------------------------|
| Nasal cavities     | Increased attenuation (rhinitis)                                       | Space-occupying lesion                                        | Loss of conchae                                                         |                                     |
| Nasolacrimal duct  | Enlargement                                                            | Wall thickening                                               | Wall lysis                                                              | Displacement                        |
| Bulla tympanica    | Increased attenuation                                                  | Enlargement                                                   | Thickening of the wall                                                  | Lysis or irregularities of the wall |
| Internal ear       | Deformation                                                            | Lysis                                                         |                                                                         |                                     |
| External ear       | Homogeneous increased attenuation                                      | Displacement                                                  | Heterogeneous increased attenuation, mass effect (aural diverticulosis) |                                     |
| Retrobulbar space  | Increased attenuation/loss of fat tissue                               | Space-occupying lesion                                        |                                                                         |                                     |
| Eye                | Exophthalmos                                                           | Deformation                                                   | Lens luxation                                                           | Rupture                             |
| Maxilla/ Mandibula | Minor lesions (bulging around tooth root, with or without focal lysis) | Major lesions (aggressive bone lesions) associated with tooth | Aggressive bone lesions not associated with tooth                       | Fracture                            |
| TMJ*               | Luxation                                                               | Fracture                                                      | Deformation                                                             | Lysis                               |
| Soft tissues       | Diffuse swelling                                                       | Solid space occupying lesion                                  | Cavernous space occupying lesion                                        |                                     |

\* temporomandibular joint.
